1 **Exome sequencing reveals aggregates of rare variants in glycosyltransferase and**  
2 **other genes influencing immunoglobulin G and transferrin glycosylation**

3

4 Arianna Landini<sup>1,2</sup>, Paul R.H.J. Timmers<sup>1,2</sup>, Azra Frkatović-Hodžić<sup>3</sup>, Irena Trbojević-  
5 Akmačić<sup>3</sup>, Frano Vučković<sup>3</sup>, Tea Pribić, Regeneron Genetics Center<sup>4</sup>, Gannie Tzoneva<sup>4</sup>, Alan  
6 R. Shuldiner<sup>4</sup>, Ozren Polašek<sup>5,6</sup>, Caroline Hayward<sup>1</sup>, Gordan Lauc<sup>3,7</sup>, James F. Wilson\*<sup>1,2</sup> &  
7 Lucija Klarić\*<sup>1</sup>

8 1 MRC Human Genetics Unit, Institute for Genetics and Cancer, University of Edinburgh,  
9 Edinburgh, United Kingdom

10 2 Centre for Global Health Research, Usher Institute, University of Edinburgh, Edinburgh,  
11 United Kingdom

12 3 Genos Glycoscience Research Laboratory, Zagreb, Croatia

13 4 Regeneron Genetics Center, Tarrytown, NY, USA

14 5 Department of Public Health, School of Medicine, University of Split, Split, Croatia

15 6 Algebra University College, Zagreb, Croatia

16 7 Faculty of Pharmacy and Biochemistry, University of Zagreb, Zagreb, Croatia

17

18 \* Authors contributed equally.

19 Correspondence to: J.F.W (jim.wilson@ed.ac.uk) or L.K. (lucija.klaric@ed.ac.uk)

20

21 **Abstract**

22 It is often difficult to be certain which genes underlie the effects seen in association studies.  
23 However, variants that disrupt the protein, such as predicted loss of function (pLoF) and  
24 missense variants, provide a shortcut to identify genes with a clear biological link to the  
25 phenotype of interest. Glycosylation is one of the most common post-  
26 translational modifications of proteins, and an important biomarker of both disease and its  
27 progression. Here, we utilised the power of genetic isolates, gene-based aggregation tests and  
28 intermediate phenotypes to assess the effect of rare (MAF<5%) pLoF and missense variants  
29 from whole exome sequencing on the N-glycome of plasma transferrin (N=1907) and  
30 immunoglobulin G (N=4912), and their effect on diseases. We identified significant gene-  
31 based associations for transferrin glycosylation at 5 genes ( $p < 8.06 \times 10^{-8}$ ) and for IgG glycan  
32 traits at 4 genes ( $p < 1.19 \times 10^{-7}$ ). Associations in three of these genes (*FUT8*, *MGAT3* and  
33 *RFXAP*) are driven by multiple rare variants simultaneously contributing to protein  
34 glycosylation. Association at *ST6GALI*, with a 300-fold up-drifted variant in the Orkney  
35 Islands, was detectable by a single-point exome-wide association analysis. Glycome-associated  
36 aggregate associations are located in genes already known to have a biological link to protein  
37 glycosylation (*FUT8*, *RFXAP* for transferrin, *FUT8*, *MGAT3* and *ST6GALI* for IgG) but also in

38 genes which have not been previously reported (e.g. *RFXAP* for IgG). To assess the potential  
39 impact of rare variants associated with glycosylation on other traits, we queried public  
40 repositories of gene-based tests, discovering a potential connection between transferrin  
41 glycosylation, *MSRI*, galectin-3, insulin-like growth factor 1 and diabetes. However, the exact  
42 mechanism behind these connections requires further elucidation.

## 43 Introduction

44 Genome-wide association studies (GWAS) have so far identified thousands of loci associated  
45 with human complex traits and diseases. However, the large majority of these variants are  
46 found in noncoding regions of the genome<sup>1</sup>, posing a challenge when attempting to uncover  
47 their functional impact on the phenotype. On the contrary, whole-exome sequencing (WES)  
48 studies offer the opportunity to identify rare variants of larger effect on the encoded protein,  
49 such as predicted loss of function (pLoF) and missense variants, for which causal biological  
50 mechanisms are generally easier to elucidate<sup>2</sup>. Methods for exome-wide rare variant analysis  
51 have been successfully employed to discover variants and genes associated with both complex  
52 molecular traits<sup>3</sup> and diseases<sup>4,5</sup>. While single-variant tests, such as GWAS, are largely adopted  
53 to explore associations of common genetic variants with phenotypes of interest, they have little  
54 power to identify rare variant associations, due to the low number of observations. Therefore,  
55 a set of methods testing cumulative effects of multiple rare variants in genetic regions, where  
56 rare variants are grouped at the gene level (also known as ‘masks’) via a collapsing test, such  
57 as burden tests, or variance-component tests (e.g. sequence kernel association test, SKAT<sup>6</sup>)  
58 were developed. In addition to increasing the statistical power by aggregating multiple rare-  
59 variants, using genetically isolated populations can provide unique opportunities for novel  
60 discovery in an association study<sup>7</sup>. Recent bottlenecks, restricted immigration and limited  
61 population size lead to increased genetic drift. Consequently, in such populations some  
62 otherwise rare variants can substantially increase in frequency compared to the general  
63 population, therefore increasing association power for these variants.

64 Glycosylation is one of the most frequent post-translational modifications, where sugar  
65 residues, called glycans, are attached to the surface of proteins. Changes in protein N-  
66 glycosylation patterns have been described in the ageing process<sup>8,9</sup> and in a wide variety of  
67 complex diseases, including autoimmune diseases<sup>10</sup>, diabetes<sup>11</sup>, cardiovascular diseases<sup>12</sup>,  
68 neurodegenerative diseases<sup>13</sup> and cancer<sup>14</sup>. Despite glycans having an important role in human  
69 health and serving as potential biomarkers in clinical prognosis and diagnosis<sup>15</sup>, we have just  
70 started scratching the surface of the complex network of genes regulating protein glycosylation.  
71 All studies published to date exploring the genetic regulation of total plasma protein,  
72 immunoglobulin G (IgG) and transferrin N-glycosylation have employed single variant-based  
73 GWAS tests, mostly uncovering common variants located in non-coding regions of the  
74 genome<sup>16–23</sup>. Rare variants contributing to glycan variation, and their impact on human health,  
75 thus remain unexplored.

76 To address this knowledge gap, we used multiple gene-based aggregation tests to investigate  
77 how rare (MAF<5%) pLoF and missense variants from whole exome sequencing affect 51  
78 transferrin (N = 1907) and 94 IgG (N = 4912) glycan traits in European-descent cohorts. IgG  
79 is both the most abundant antibody and one of the most abundant proteins in human serum. It  
80 contains evolutionary conserved N-glycosylation sites in the constant region of each of its  
81 heavy chains, occupied by biantennary, largely core-fucosylated and partially truncated glycan  
82 structures, that may carry a bisecting N-acetylglucosamine and sialic acid residues<sup>24,25</sup>.  
83 Transferrin is a blood plasma glycoprotein that binds iron (Fe) and consequently mediates its

84 transport through blood plasma. Human transferrin has two N-glycosylation sites, with  
85 biantennary disialylated digalactosylated glycan structure without fucose being the most  
86 abundant glycan attached<sup>26,27</sup>.

87 In this study, we used gene-based aggregation of rare variants to identify several genes  
88 associated with transferrin and IgG glycosylation traits. Significant genes include known  
89 protein glycosylation genes as well as novel genes with no previously known role in post-  
90 translational modification. Importantly, several associations would not have been detectable by  
91 single-point analysis and one association was detected thanks to enrichment of rare variants in  
92 population isolates. Finally, we highlight the impact of rare variation in these genes on health-  
93 related traits by performing gene-based aggregation tests of 116 health-related traits together  
94 with gene lookups in public repositories of gene-based association tests

## 95 Results

### 96 Exome variant annotation

97 To assess the effect of rare genetic variants on glycosylation of two proteins, we sequenced the  
 98 exomes of 4,801 participants of European ancestry. After quality control, a total of 233,820  
 99 distinct autosomal coding genetic variants were available in the ORCADES cohort (N=2090),  
 100 244,649 in the VIKING cohort (N=2106) and 340,203 in the CROATIA-Korcula cohort  
 101 (N=2872). Percentages of variants for each effect category in the total sequenced coding  
 102 variation are similar across the three cohorts (Table 1). More than half (~53%) of the sequenced  
 103 coding variants are missense variants, of which nearly half (~28% of total coding variation) are  
 104 classified as likely or possibly deleterious by multiple variant effect predictor algorithms (see  
 105 Methods). The second most represented effect category is synonymous mutations (~33%),  
 106 followed by variants in splice regions (~8%), predicted loss of function (pLoF) (~4%) and in-  
 107 frame insertions/deletions (~1.5%). Around one quarter of coding variants in the ORCADES  
 108 and VIKING cohorts are singletons (minor allele count, MAC=1); this percentage is instead  
 109 higher in CROATIA-Korcula cohort (~35%), possibly due to the larger sequenced sample size.

110 **Table 1. Number of coding exome variants sequenced in the complete sample of 3 isolated**  
 111 **cohorts.** Counts and prevalence of autosomal variants observed in WES-targeted regions  
 112 across all individuals in the ORCADES, CROATIA-Korcula and VIKING cohort, by type or  
 113 functional class for all and for singleton variants (MAC= 1).

| Variant category           | ORCADES (N=2090) |                            |                       | CROATIA-Korcula (N=2872) |                            |                       | VIKING (N=2106) |                            |                       |
|----------------------------|------------------|----------------------------|-----------------------|--------------------------|----------------------------|-----------------------|-----------------|----------------------------|-----------------------|
|                            | No. of variants  | % of total coding variants | Variants % with MAC=1 | No. of variants          | % of total coding variants | Variants % with MAC=1 | No. of variants | % of total coding variants | Variants % with MAC=1 |
| <b>coding variants</b>     | 233,820          |                            | 25.1%                 | 340,203                  |                            | 35.5%                 | 244,649         |                            | 28.9%                 |
| <b>pLOF</b>                | 8639             | 3.69%                      | 37.1%                 | 12,970                   | 3.81%                      | 47.2%                 | 9025            | 3.69%                      | 41.4%                 |
| Splice acceptor            | 872              | 0.37%                      | 37.8%                 | 1309                     | 0.38%                      | 45.5%                 | 945             | 0.39%                      | 42.7%                 |
| Splice donor               | 1042             | 0.45%                      | 37.5%                 | 1506                     | 0.44%                      | 48.1%                 | 1079            | 0.44%                      | 40.4%                 |
| Stop gained                | 2833             | 1.21%                      | 36.8%                 | 4171                     | 1.23%                      | 47%                   | 2879            | 1.18%                      | 41.8%                 |
| Frameshift                 | 3401             | 1.45%                      | 37.8%                 | 5274                     | 1.55%                      | 47.9%                 | 3583            | 1.46%                      | 42.1%                 |
| Stop lost                  | 151              | 0.06%                      | 32.5%                 | 244                      | 0.07%                      | 43%                   | 182             | 0.07%                      | 39%                   |
| Start lost                 | 340              | 0.15%                      | 30%                   | 466                      | 0.14%                      | 44.2%                 | 357             | 0.15%                      | 30.3%                 |
| <b>Missense</b>            | 124,416          | 53.2%                      | 27%                   | 183,056                  | 53.8%                      | 37.6%                 | 130,299         | 53.3%                      | 30.6%                 |
| Likely benign (0-1)        | 56,366           | 24.1%                      | 21.8%                 | 80,777                   | 23.7%                      | 31.6%                 | 59,141          | 24.2%                      | 25.4%                 |
| Possibly deleterious (2-3) | 31,693           | 13.5%                      | 28.1%                 | 47,235                   | 13.9%                      | 39.1%                 | 33,138          | 13.5%                      | 31.6%                 |

|                          |        |       |       |         |       |       |        |       |       |
|--------------------------|--------|-------|-------|---------|-------|-------|--------|-------|-------|
| Likely deleterious (4-5) | 35,728 | 15.3% | 34.2% | 54,187  | 15.9% | 45.4% | 37,384 | 15.3% | 38.2% |
| Unclassified missense    | 629    | 0.27% | 23%   | 857     | 0.25% | 29.3% | 636    | 0.26% | 23.1% |
| <b>Splice region</b>     | 18,580 | 7.95% | 24.7% | 26660   | 7.84% | 32.4% | 19,297 | 7.89% | 27.8% |
| <b>In-frame indel</b>    | 3383   | 1.45% | 21.5% | 5244    | 1.54% | 29.5% | 3606   | 1.47% | 26%   |
| <b>Protein altering</b>  | 3      | 0%    | 33.3% | 4       | 0%    | 25%   | 2      | 0%    | 0%    |
| <b>Stop retained</b>     | 1      | 0%    | 0%    | 2       | 0%    | 50%   | 1      | 0%    | 25.2% |
| <b>Synonymous</b>        | 78,798 | 33.7% | 21.1% | 112,267 | 33%   | 31.6% | 82,419 | 33.7% | 100%  |

114

### 115 Exome-wide aggregated rare variant analysis of transferrin and IgG glycomes

116 We performed exome-wide gene-based tests across 51 transferrin traits (glycome subset of  
 117 CROATIA-Korcula N = 948, VIKING N = 959) and 94 IgG glycan traits (glycome subset of  
 118 ORCADES N = 1960, CROATIA-Korcula N = 1866, VIKING N = 1086), testing low  
 119 frequency and rare (MAF <5%) pLoF and missense variants. In total, we identified 16  
 120 significant associations for transferrin- (Supplementary Table 1) and 32 significant associations  
 121 for IgG- (Supplementary table 2) glycan traits, at Bonferroni-corrected p-values of  $8.06 \times 10^{-8}$   
 122 and  $1.19 \times 10^{-7}$ , respectively (Figure 1, Table 2). Most gene-aggregated rare variants were  
 123 associated with protein-specific glycans (transferrin: variants in *FUT6*, *TIRAP*, *MSR1* and  
 124 *FOXII* genes, IgG: variants in *MGAT3*, *ST6GAL1* and *RFXAP* genes); only *FUT8* was  
 125 associated with glycans from both proteins (Table 2, Supplementary Tables 1 and 2). Almost  
 126 all identified genes encode key enzymes in protein glycosylation (*MGAT3*, *ST6GAL1*, *FUT6*,  
 127 *FUT8*) or have been previously associated with transferrin and IgG glycan traits in GWAS  
 128 analysis (*MSR1*, *FOXII*)<sup>17,18</sup>. The exceptions are *TIRAP* and *RFXAP*, which have no previously  
 129 known link to protein glycosylation. We successfully replicated (p-value <  $3.2 \times 10^{-4}$  for  
 130 transferrin, p-value <  $5.9 \times 10^{-4}$  for IgG) associations of glycans with low-frequency and rare  
 131 variants from 4 genes - *FUT6* and *TIRAP* with transferrin glycans, and *FUT8* and *MGAT3* for  
 132 IgG glycans (Table 2) - as frequencies of variants in these genes are similar across the studied  
 133 cohorts (Supplementary Table 3). While the associations of IgG glycans and variants from  
 134 *FUT8* replicated, the association of transferrin glycans with variants from the same gene did  
 135 not reach the significance threshold for replication (p-value in VIKING =  $1.7 \times 10^{-3}$ ), likely  
 136 because of the 7-fold decreased frequency of the rs2229678 variant in the VIKING (MAF =  
 137 0.0056) compared to CROATIA-Korcula (MAF = 0.049) cohort (Supplementary Table 4).  
 138 However, given the known biological role of *FUT8* in protein glycosylation as a  
 139 fucosyltransferase (one of the enzymes involved in the synthesis of glycans), we believe this  
 140 association to be real. Associations of rare variants from the CROATIA-Korcula cohort in the  
 141 *MSR1* gene with transferrin glycosylation also did not formally replicate in the VIKING cohort  
 142 (p-value =  $8.6 \times 10^{-4}$ ) (Table 2). However, the cumulative allele count of rare variants in this  
 143 gene is different between CROATIA-Korcula (MAC=46) and the VIKING cohort (MAC=38)  
 144 (Supplementary Table 3), decreasing the power to replicate. We also detected a couple of

145 isolate-specific associations that are driven by variants increased in frequency compared to  
146 publicly accessible biobanks and variant repositories. Namely, the rs750567016 variant in  
147 *ST6GAL1* that affects IgG glycosylation is more than 300 times more common in ORCADES  
148 (MAF =  $3.3 \times 10^{-3}$ ) than in UK Biobank (MAF =  $1.0 \times 10^{-5}$ ) or gnomAD (MAF =  $9.0 \times 10^{-6}$ ) and  
149 is absent from CROATIA-Korcula and VIKING cohorts. The rs115399307 variant in *FOXI1*,  
150 associated with transferrin glycosylation, is seven times more common in VIKING (MAF =  
151  $2.1 \times 10^{-2}$ ) than in CROATIA-Korcula cohort (MAF =  $2.7 \times 10^{-3}$ ), UK Biobank (MAF =  $8.5 \times 10^{-3}$ )  
152 and gnomAD (MAF =  $7.1 \times 10^{-3}$ ) (Supplementary Table 4). While the role of sialyltransferase  
153 *ST6GAL1* in IgG glycosylation is well described, the roles of the transcription factor *FOXI1*  
154 and the regulatory factor X-associated protein *RFXAP* still need to be confirmed and  
155 investigated.

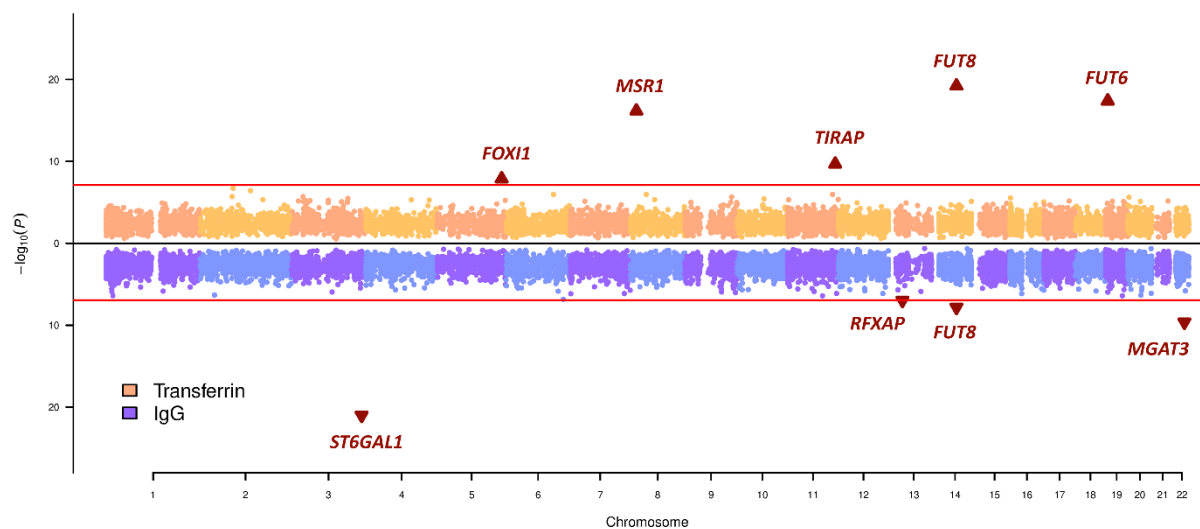

156  
157 **Figure 1. Miami plot summarising the results from exome-wide gene-based tests for**  
158 **transferrin and IgG glycan traits.** Genomic positions of the genes, calculated as the mean  
159 position of variants included in the reported mask, are labelled on the x-axis and the  $-\log_{10}$  of  
160 the p-value for each rare-variants aggregating test on the y-axis. For each gene-glycan  
161 association, the lowest p-value across multiple masks, multiple variant aggregate tests and  
162 cohorts was selected for plotting. The Bonferroni-corrected significance threshold for  
163 transferrin glycan traits (horizontal red line in the top part of the plot) corresponds to  $8.06 \times 10^{-8}$ ,  
164 while Bonferroni-corrected threshold for the IgG glycan traits (horizontal red line in the  
165 bottom part of the plot) corresponds to  $1.19 \times 10^{-7}$ . Genes significantly associated with  
166 transferrin/IgG glycan traits are indicated with a triangle and labelled, while genes not passing  
167 the significance threshold are indicated with dots.

168 **Table 2: Gene-based rare variants associations of transferrin and IgG glycosylation.**

| Lead glycan             | Gene           | MAF   | Variants                    | N variants | Discovery cohort | Discovery P            | Assoc. test | Discovery MAF | Discovery AC | Repl. cohort    | Repl. P                | Repl. MAF | Repl. AC | No. of glycans |
|-------------------------|----------------|-------|-----------------------------|------------|------------------|------------------------|-------------|---------------|--------------|-----------------|------------------------|-----------|----------|----------------|
| <b>Transferrin</b>      |                |       |                             |            |                  |                        |             |               |              |                 |                        |           |          |                |
| TfGP20                  | <i>FUT8</i>    | <0.05 | pLoF and deleterious (1/5)* | 6          | CROATIA-Korcula  | 6.29x10 <sup>-20</sup> | Burden      | 0.0111        | 124          | VIKING          | 1.73x10 <sup>-3</sup>  | 0.0042    | 8        | 3              |
| TfGP32                  | <i>FUT6</i>    | <0.05 | pLoF and deleterious (1/5)* | 5          | CROATIA-Korcula  | 4.31x10 <sup>-18</sup> | SKAT        | 0.0097        | 90           | VIKING          | 1.56x10 <sup>-14</sup> | 0.0072    | 96       | 8              |
| TfGP35                  | <i>MSR1</i>    | <0.05 | pLoF                        | 3          | CROATIA-Korcula  | 6.93x10 <sup>-17</sup> | Burden      | 0.0083        | 46           | VIKING          | 8.64x10 <sup>-4</sup>  | 0.01      | 38       | 2              |
| TfGP17                  | <i>TIRAP</i>   | <0.05 | pLoF and deleterious (1/5)* | 3          | VIKING           | 2.17x10 <sup>-10</sup> | SKAT-O      | 0.0077        | 44           | CROATIA-Korcula | 8.12x10 <sup>-9</sup>  | 0.0076    | 98       | 2              |
| TfGP23                  | <i>FOX11</i>   | <0.05 | pLoF and missense           | 3          | VIKING           | 1.37x10 <sup>-8</sup>  | SKAT-O      | 0.0074        | 42           | CROATIA-Korcula | 1.56x10 <sup>-2</sup>  | 0.0014    | 8        | 1              |
| <b>IgG</b>              |                |       |                             |            |                  |                        |             |               |              |                 |                        |           |          |                |
| FG2S1/(FG2+FG2S1+FG2S2) | <i>ST6GAL1</i> | <0.01 | pLoF and missense           | 2          | ORCADES          | 9.82x10 <sup>-22</sup> | Burden      | 0.0019        | 15           | -               | -                      | -         | -        | 9              |
| Fn/(Bn+FBn)             | <i>MGAT3</i>   | <0.01 | pLoF and deleterious (1/5)* | 4          | ORCADES          | 2.31x10 <sup>-10</sup> | SMMAT-E     | 0.0021        | 33           | CROATIA-Korcula | 6.57x10 <sup>-9</sup>  | 0.0012    | 29       | 17             |
| FG1n total/G1n          | <i>FUT8</i>    | <0.05 | pLoF and missense           | 7          | CROATIA-Korcula  | 6.74x10 <sup>-8</sup>  | Burden      | 0.0072        | 177          | ORCADES         | 3.04x10 <sup>-6</sup>  | 0.0037    | 43       | 5              |



|                                                                                                                                                                                                                                                                                                                                                                                                                                                                                                                                                                                                                                                                                                                                                                                                                                                                                                                                                                                                                                                                                                                                                                                                                                                                                                                                                                                                                                                                                                                                                                                             |              |       |                   |   |         |                       |         |        |    |        |                       |        |   |   |
|---------------------------------------------------------------------------------------------------------------------------------------------------------------------------------------------------------------------------------------------------------------------------------------------------------------------------------------------------------------------------------------------------------------------------------------------------------------------------------------------------------------------------------------------------------------------------------------------------------------------------------------------------------------------------------------------------------------------------------------------------------------------------------------------------------------------------------------------------------------------------------------------------------------------------------------------------------------------------------------------------------------------------------------------------------------------------------------------------------------------------------------------------------------------------------------------------------------------------------------------------------------------------------------------------------------------------------------------------------------------------------------------------------------------------------------------------------------------------------------------------------------------------------------------------------------------------------------------|--------------|-------|-------------------|---|---------|-----------------------|---------|--------|----|--------|-----------------------|--------|---|---|
| GP21                                                                                                                                                                                                                                                                                                                                                                                                                                                                                                                                                                                                                                                                                                                                                                                                                                                                                                                                                                                                                                                                                                                                                                                                                                                                                                                                                                                                                                                                                                                                                                                        | <i>RFXAP</i> | <0.01 | pLoF and missense | 2 | ORCADES | 1.04x10 <sup>-7</sup> | SMMAT-E | 0.0033 | 26 | VIKING | 6.29x10 <sup>-2</sup> | 0.0009 | 2 | 1 |
| <p>Lead glycan - glycan trait reporting the strongest rare-variants association at the gene. Gene – gene for which rare variants are grouped. MAF - the highest allele frequency of variants aggregated for the mask. Variants - functional consequence of variants in the mask, aggregated in the given gene (pLoF – predicted loss of function: * denotes the number of algorithms predicting the missense variant to be deleterious). N variants - number of variants included in the mask. Discovery cohort - cohort reporting the lower p-value for the glycan-gene association. Discovery/Repl. P - p-value of the gene-based association with the lead glycan trait in the discovery/replication cohort. Assoc. test – gene-based association test for which p-value is reported. Discovery/repl. MAF - mean minor allele frequency of variants from the mask in the discovery/replication cohort. Discovery/repl. AC - sum of allele counts of variants from the mask in the discovery/replication cohort. Repl. Cohort - cohort reporting the higher p-value for the glycan-gene association. No. of glycans - number of other glycan traits associated with variants from the same mask. Results for transferrin glycome are reported at the top of the table, while results for IgG glycome are reported at the bottom of the table. Discovery significance threshold is 8.06x10<sup>-8</sup> for transferrin and 1.19x10<sup>-7</sup> for IgG glycans. Replication significance threshold is 3.23x10<sup>-4</sup> for transferrin and 5.95x10<sup>-4</sup> for IgG glycans.</p> |              |       |                   |   |         |                       |         |        |    |        |                       |        |   |   |

169

## 170 **IgG glycans gene-based aggregation meta-analysis**

171 To further increase statistical power, we performed gene-based aggregation meta-analysis of  
172 IgG glycan traits for ORCADES and VIKING cohorts. In addition to two genes already found  
173 to be associated with IgG in the cohort-specific analysis (*MGAT3* and *ST6GALI*), the combined  
174 analysis of VIKING and ORCADES cohort added *FUT6* to the list of genes whose rare variants  
175 are significantly ( $p\text{-value} < 1.19 \times 10^{-7}$ ) associated with IgG glycan traits (Supplementary Table  
176 5). *FUT6* is another gene known to be involved in glycosylation<sup>17,20,22,23</sup>, encoding a  
177 glycosyltransferase enzyme that catalyses the transfer of fucose moieties to a growing glycan  
178 chain.

179

## 180 **Genetic architecture of aggregated effects of rare-variants**

181 To better understand the genetic architecture of identified associations, we next assessed  
182 whether our findings could be discoverable within a GWAS framework and whether they are  
183 driven by single variants or multiple rare variants working in concert to affect levels of  
184 transferrin/IgG glycosylation.

185 We first performed GWAS on imputed genotypes for each glycan trait and then repeated the  
186 rare variant association tests incorporating the dosages of GWAS sentinel SNPs as additional  
187 covariates. Genome-wide significant (transferrin  $p\text{-value} < 1.61 \times 10^{-9}$ , IgG  $p\text{-value} < 2.38 \times 10^{-9}$ )  
188 associations reported in this study (Supplementary Table 6 for transferrin glycans and  
189 Supplementary Table 7 for IgG glycans) have been described in further details in Landini *et al.*<sup>18</sup>  
190 and Klarić *et al.*<sup>17</sup>. Overall, aggregated associations with variants from 3 out of 8 genes,  
191 *FUT8*, *ST6GALI* and *MGAT3*, remained significant ( $p\text{-value} < 8.06 \times 10^{-8}$  for transferrin and  $p\text{-value} < 1.19 \times 10^{-7}$   
192 for IgG) after conditioning on sentinel GWAS associations (Table 3). For one  
193 gene, *RFXAP*, there were no significant associations in the GWAS analysis, while the  
194 remaining four gene-based associations (*FUT6*, *MSRI*, *FOXII* and *TIRAP*) were explained by  
195 sentinel GWAS variants. For two of these genes, *FUT6* and *FOXII*, the GWAS sentinel  
196 variants are low frequency ( $0.02 < \text{MAF} < 0.05$ ; Supplementary Table 8). More specifically, for  
197 transferrin glycans, 14 out of the 16 glycome-gene aggregate pairs fail to reach genome-wide  
198 significance ( $p\text{-value} < 8.06 \times 10^{-8}$ ) after conditioning on GWAS sentinel SNPs (Supplementary  
199 Table 9), meaning that a considerable part of the rare variant signal was dependent on variants  
200 identifiable by GWAS. In contrast, for IgG glycans, 24 of the 32 glycome-gene aggregate pairs  
201 remained significant ( $p\text{-value} < 1.19 \times 10^{-7}$ ), even after adjusting for GWAS sentinel SNPs  
202 (Supplementary Table 10).

203 Next, we performed single-point exome-wide association analysis (ExWAS) and repeated the  
204 aggregated rare variant association tests while conditioning on the sentinel ExWAS  
205 associations. In this way we tested whether the rare-variants associations with glycosylation  
206 were driven by a single variant (i.e. showed an attenuated signal after conditioning on the  
207 sentinel ExWAS variant) or were actually affected by multiple rare variants in concert (i.e.  
208 associations remain significant after the conditioning). Two of the associations, between

209 variants in the *FUT8* gene and IgG glycans, and variants in the *MGAT3* gene and transferrin  
210 glycans, remain significant after conditioning on the sentinel ExWAS variant (Table 3). Upon  
211 closer inspection, for both of these genes, the sentinel ExWAS variant was a common variant  
212 that is also an eQTL for the gene in blood (eQTLGen<sup>28</sup>: rs35949016, *FUT8* eQTL, p-value =  
213  $6.5 \times 10^{-159}$ ; rs6001566, *MGAT3* eQTL p-value =  $3.9 \times 10^{-230}$ ) (Supplementary Table 8). Hence,  
214 it appears that glycosylation is affected by common variants and independently by aggregates  
215 of rare variants in these two genes. Indeed, by looking at the single-point effects of each rare  
216 variant from the mask, we can see that multiple independent rare variants contribute to the  
217 effect on glycosylation levels (Supplementary Table 11).

218 In summary, four of the identified associations, three with low-frequency variants from *FUT6*,  
219 *MSRI* and *FOXII* and one with a common variant from the *TIRAP* gene, could have been  
220 discovered using a GWAS of imputed genotype data. On the other hand, the rare variant  
221 association at *ST6GALI* gene could only have been discovered using an ExWAS, as it is too  
222 rare to be imputed well. Finally, associations with variants from two genes, *FUT8* and *MGAT3*,  
223 are driven by multiple rare variants simultaneously contributing to glycosylation of IgG and  
224 transferrin. Also the rare variant association at *RFXAP* gene could not have been discovered  
225 by either GWAS or ExWAS as there were no significant single-point associations. However,  
226 it is important to note that we could not replicate this association because the variants from its  
227 mask are depleted in the other studied cohorts (Supplementary Table 4).

228 **Table 3: Genetic architecture of aggregated effect of rare variant associations when conditioning on sentinel variants from GWAS or**  
 229 **ExWAS analysis.** Two associations, those with variants from the *FUT8* and *MGAT3* regions remain significant after conditioning on  
 230 GWAS/ExWAS sentinel variants. Associations with variants from the *MSRI* gene are dependent on both GWAS and ExWAS sentinel variants.  
 231 The association with variants from the *ST6GAL1* gene is driven by the sentinel ExWAS variant, which was not present in the imputed GWAS.

| Lead glycan                                                                                                                                                                                                                                                                                                                                                                                                                                                                                                                                                                                                                                                                                                                                                                                                                                                                                                                    | Gene           | MAF   | Variants                    | Association test | cohort          | Discovery P            | GWAS adj p               | ExWAS adj p              |
|--------------------------------------------------------------------------------------------------------------------------------------------------------------------------------------------------------------------------------------------------------------------------------------------------------------------------------------------------------------------------------------------------------------------------------------------------------------------------------------------------------------------------------------------------------------------------------------------------------------------------------------------------------------------------------------------------------------------------------------------------------------------------------------------------------------------------------------------------------------------------------------------------------------------------------|----------------|-------|-----------------------------|------------------|-----------------|------------------------|--------------------------|--------------------------|
| <b>Transferrin</b>                                                                                                                                                                                                                                                                                                                                                                                                                                                                                                                                                                                                                                                                                                                                                                                                                                                                                                             |                |       |                             |                  |                 |                        |                          |                          |
| TfGP20                                                                                                                                                                                                                                                                                                                                                                                                                                                                                                                                                                                                                                                                                                                                                                                                                                                                                                                         | <i>FUT8</i>    | <0.05 | pLoF and deleterious (1/5)* | Burden           | CROATIA-Korcula | 6.29x10 <sup>-20</sup> | 2.75x10 <sup>-12</sup>   | 2.70 x10 <sup>-15</sup>  |
| TfGP32                                                                                                                                                                                                                                                                                                                                                                                                                                                                                                                                                                                                                                                                                                                                                                                                                                                                                                                         | <i>FUT6</i>    | <0.05 | pLoF and deleterious (1/5)* | SKAT             | CROATIA-Korcula | 4.31x10 <sup>-18</sup> | 3.07x10 <sup>-1</sup>    | 2.94 x10 <sup>-1</sup>   |
| TfGP35                                                                                                                                                                                                                                                                                                                                                                                                                                                                                                                                                                                                                                                                                                                                                                                                                                                                                                                         | <i>MSRI</i>    | <0.05 | pLoF                        | Burden           | CROATIA-Korcula | 6.93x10 <sup>-17</sup> | 6.62x10 <sup>-7</sup>    | 3.70 x10 <sup>-3</sup>   |
| TfGP17                                                                                                                                                                                                                                                                                                                                                                                                                                                                                                                                                                                                                                                                                                                                                                                                                                                                                                                         | <i>TIRAP</i>   | <0.05 | pLoF and deleterious (1/5)* | SKAT-O           | VIKING          | 2.17x10 <sup>-10</sup> | 8.61x10 <sup>-1</sup>    | 1.38 x10 <sup>-1</sup>   |
| TfGP23                                                                                                                                                                                                                                                                                                                                                                                                                                                                                                                                                                                                                                                                                                                                                                                                                                                                                                                         | <i>FOXII</i>   | <0.05 | pLoF and missense           | SKAT-O           | VIKING          | 1.37x10 <sup>-08</sup> | 6.85x10 <sup>-1</sup>    | 6.38 x10 <sup>-1</sup>   |
| <b>IgG</b>                                                                                                                                                                                                                                                                                                                                                                                                                                                                                                                                                                                                                                                                                                                                                                                                                                                                                                                     |                |       |                             |                  |                 |                        |                          |                          |
| FG2S1/(FG2+F G2S1+FG2S2)                                                                                                                                                                                                                                                                                                                                                                                                                                                                                                                                                                                                                                                                                                                                                                                                                                                                                                       | <i>ST6GAL1</i> | <0.01 | pLoF and missense           | Burden           | ORCADES         | 9.82x10 <sup>-22</sup> | 6.99x10 <sup>-19</sup>   | 1.44 x10 <sup>-2</sup>   |
| Fn/(Bn+FBn)                                                                                                                                                                                                                                                                                                                                                                                                                                                                                                                                                                                                                                                                                                                                                                                                                                                                                                                    | <i>MGAT3</i>   | <0.01 | pLoF and deleterious (1/5)* | SMMAT-E          | ORCADES         | 2.31x10 <sup>-10</sup> | 5.47x10 <sup>-10</sup>   | 5.68 x10 <sup>-10</sup>  |
| FG1n total/G1n                                                                                                                                                                                                                                                                                                                                                                                                                                                                                                                                                                                                                                                                                                                                                                                                                                                                                                                 | <i>FUT8</i>    | <0.05 | pLoF and missense           | Burden           | CROATIA-Korcula | 6.74x10 <sup>-8</sup>  | 2.31x10 <sup>-6</sup>    | 8.4x10 <sup>-6</sup>     |
| GP21                                                                                                                                                                                                                                                                                                                                                                                                                                                                                                                                                                                                                                                                                                                                                                                                                                                                                                                           | <i>RFXAP</i>   | <0.01 | pLoF and missense           | SMMAT-E          | ORCADES         | 1.04x10 <sup>-7</sup>  | 1.04x10 <sup>-7***</sup> | 1.04x10 <sup>-7***</sup> |
| Lead glycan - glycan trait reporting the strongest rare-variants association at the gene. Gene – gene for which rare variants are grouped. MAF - the highest allele frequency of variants aggregated for the mask. Variants - functional consequence of variants in the mask, aggregated in the given gene (pLoF – predicted loss of function: * denotes the number of algorithms predicting the missense variant to be deleterious). Association test – gene-based association test for which p-value is reported. Cohort - cohort reporting the lower p-value for the glycan-gene association. Discovery P - p-value of the gene-based association test with the lead glycan trait in the cohort. GWAS adj p – p-value of association test when conditioning on the significant variants from the GWAS analysis; ** no significant GWAS variants were found.. ExWAS adj p – p-value of association test when conditioning on |                |       |                             |                  |                 |                        |                          |                          |

the significant variants from the ExWAS analysis; \*\* no significant ExWAS variants were found. Results for transferri glycome are reported at the top of the table, while results for IgG glycome are reported at the bottom of the table. P-value significance threshold is  $8.06 \times 10^{-8}$  for transferrin and  $1.19 \times 10^{-7}$  for IgG glycans.

### 233 **Links to health-related traits**

234 We next wanted to assess the potential impact of rare protein glycosylation variants on health.  
235 Since some of the gene-glycan associations are population-specific, stemming from the genetic  
236 drift in isolated populations, we first performed “gene-level PheWAS” with quantitative health-  
237 related traits measured in studied cohorts. At the same time, since these cohorts, because of  
238 their sample size, might be underpowered to detect associations with common diseases, we  
239 queried public repositories of aggregated rare-variants associations for these genes.

240 We performed exome-wide “gene-level PheWAS” with 116 quantitative health-related traits  
241 measured in the ORCADES, CROATIA-Korcula and VIKING cohorts, limited to the genes  
242 containing pLoF and missense variants that were associated with transferrin or IgG glycome  
243 variation (Table 2). When possible, we sought to perform the analysis in the same cohort where  
244 the glycan-gene association was discovered. The only significant ( $p\text{-value} < 5.4 \times 10^{-5}$ )  
245 association was with transferrin glycosylation-associated rare variants from the *MSRI* gene and  
246 blood levels of HbA1c in the VIKING cohort (Supplementary Table 12). However, the  
247 association with HbA1c levels is not significant in CROATIA-Korcula, the cohort where we  
248 discovered the connection between *MSRI* and transferrin glycosylation, and it also does not  
249 replicate in ORCADES, suggesting that it might be a false positive association. We next  
250 checked whether any of the glycome-associated genes were significantly associated with  
251 health-related traits in UK Biobank. We used two repositories of aggregated rare-variants  
252 associations: Genebass<sup>29</sup> and the AstraZeneca PheWAS portal<sup>30</sup>. Missense variants from the  
253 *MSRI* gene were significantly associated with insulin-like growth factor 1 levels (*IGF1*) in  
254 both Genebass (SKAT-O  $p\text{-value} = 4.6 \times 10^{-10}$ ) and the PheWAS portal ( $p\text{-value} = 1.6 \times 10^{-24}$ , for  
255 the “ptv5pct” collapsing model).

## 256 Discussion

257 Statistical power to detect associations with rare genetic variants can be increased by  
258 aggregating the association signals across multiple rare variants in a gene<sup>31</sup>, or by using  
259 genetically isolated populations where, due to genetic drift, some variants are increased in  
260 frequency compared to a general population<sup>32</sup>. Further, intermediate phenotypes, more  
261 proximal to the genes and consequently more strongly influenced by them, can be used as  
262 “proxies” of complex diseases to boost power. Glycosylation, one of the most common post-  
263 translational modifications, is one such intermediate phenotype and has been implicated in  
264 many diseases<sup>10,13,14</sup>. Here, we utilised the power of genetic isolates, aggregation of multiple  
265 rare variants and intermediate phenotypes to study the effect of rare variants on glycosylation  
266 of two proteins and their effect on disease.

267 We performed multiple gene-based aggregation tests to assess associations with transferrin (N  
268 = 1907) and IgG (N = 4912) glycan traits in three isolated cohorts of European descent, testing  
269 rare (MAF<5%) pLoF and missense variants from whole exome sequencing. We found rare  
270 variants from 8 genes contributing to glycan levels of either IgG or transferrin. As previously  
271 observed in GWAS using imputed genotypes, transferrin and IgG glycans showed mostly  
272 protein-specific gene-based associations<sup>18</sup>, including genes encoding known glycosylation  
273 enzymes (transferrin - *TIRAP*, a gene in the proximity of *ST3GAL4*; IgG - *ST6GAL1* and  
274 *MGAT3*), transcription factors (transferrin - *FOXII*), as well as other genes (transferrin - *MSRI*;  
275 IgG - *RFXAP*). On the other hand, rare variants in *FUT8* and *FUT6*, genes encoding  
276 fucosyltransferase enzymes adding core and antennary fucose structures to the synthesised  
277 glycan, were associated with glycosylation of both proteins. Previously we showed that, while  
278 glycosylation of both transferrin and IgG proteins is associated with genes encoding *FUT6* and  
279 *FUT8* fucosylation enzymes, these associations are driven by independent, protein-specific  
280 variants mapped to the regulatory region of the two genes<sup>18</sup>. Accordingly, here we identified  
281 rare variants in the exonic portions of *FUT8* and *FUT6*, acting independently or in concert with  
282 GWAS-identifiable variants.

283 We successfully replicated 4 gene-glycan associations (*FUT6*, *FUT8*, *TIRAP* and *MGAT3*);  
284 however, noting variants in certain genes were lower in frequency (*MSRI* and *FOXII*) or  
285 completely absent (*ST6GAL1* and *RFXAP*) in replication cohorts, we were underpowered to  
286 replicate the glycan associations with the remaining four genes. Two of the 8 identified  
287 associations, the ones with variants from the *FUT8* and *MGAT3* genes, were driven by multiple  
288 rare variants simultaneously contributing to protein glycosylation. The association with  
289 variants from the *ST6GAL1* gene would have been discovered using single-point ExWAS (but  
290 not GWAS). Interestingly, for all three of these genes, we have also detected common variants  
291 independently affecting IgG and transferrin glycans. While four associations (*TIRAP*, *FUT6*,  
292 *MSRI* and *FOXII*) could have been discovered using a GWAS of imputed genotype data, three  
293 of them (*FUT6*, *MSRI* and *FOXII*) were with low frequency variants ( $0.02 < \text{MAF} < 0.05$ ).  
294 The associations with the *RFXAP* gene could not have been discovered by either GWAS or  
295 ExWAS single-point analysis.

296

297 Except for *RFXAP* and *TIRAP*, all of 8 identified genes have already been associated with IgG  
298 and transferrin glycosylation in previous GWAS studies<sup>17,18,20,22,23</sup>. The novel gene *TIRAP* is  
299 located in close proximity to *ST3GAL4*, another glycosyltransferase-coding gene known to be  
300 associated with transferrin glycosylation. *TIRAP* has a function in the innate immune system,  
301 where it is involved in cytokine secretion and the inflammatory response<sup>33,34</sup>. The lead rare  
302 variant in the mask, rs8177399 (Supplementary Table 3), in addition to being an expression  
303 QTL (eQTL) for *TIRAP* and several other genes, is also a splicing QTL (sQTL) for *ST3GAL4*  
304 in whole blood (GTE<sub>x</sub><sup>35</sup>, p-value =  $1.9 \times 10^{-8}$ ). The regulatory factor X-associated protein  
305 encoded by *RFXAP* gene, whose variants are associated with IgG glycans, is part of a  
306 multimeric complex, called the RFX DNA-binding complex, that binds to certain major  
307 histocompatibility (MHC) class II gene promoters and activates their transcription. MHC-II  
308 molecules are transmembrane proteins, found on the surface of professional antigen-presenting  
309 cells (including B cells)<sup>36</sup>, which have a central role in development and control of the immune  
310 response. While the mechanism of *TIRAP*'s influence on the glycome could be through  
311 controlling the splicing of the known glycosyltransferase enzyme *ST3GAL4*, the precise role  
312 of *RFXAP* in protein glycosylation still needs to be established.

313 Changes in the glycosylation patterns are often observed in a wide range of pathological states,  
314 such as cancer, inflammatory, autoimmune, neurodegenerative and cardiovascular diseases<sup>37–</sup>  
315 <sup>40</sup>. We thus assessed the potential involvement of glycome-associated genes in health, by  
316 performing, in the same three cohorts, gene-based association tests of 116 quantitative health-  
317 related traits, limited to genes whose rare variants we found associated with the protein  
318 glycomes. However, given the likely small effect-size of variants on complex diseases, we did  
319 not find any significant associations. On the other hand, using publicly available repositories  
320 of gene-based associations in the UK Biobank data, we found that rare missense variants from  
321 *MSRI* (associated with transferrin glycosylation) were also associated with blood levels of  
322 insulin-like growth factor 1 (IGF1). IGF1 is a hormone with significant structural and  
323 functional similarities to insulin: lower levels of IGF1 are associated with higher risk of Type  
324 1 and 2 diabetes mellitus<sup>41,42</sup>. Recently, a rare deleterious missense variant in *IGF1* receptor  
325 (*IGF1R*) was found to be significantly associated with Type 2 diabetes in UK Biobank, further  
326 corroborating the link between IGF1 and diabetes<sup>43</sup>. In addition, genetic variants in *MSRI* have  
327 been previously associated with plasma levels of the galectin-3-binding protein<sup>44</sup>. Similarly to  
328 IGF1, galectin-3 has been identified as a marker and a pathogenic factor in type 2 diabetes,  
329 with the serum protein levels increased in type 2 diabetes patients<sup>47–51</sup>. An important part of  
330 iron delivery depends on recycling transferrin via clathrin-mediated endocytosis.  
331 Interestingly, binding of galectin-3 to transferrin can affect its intracellular trafficking<sup>45,46</sup>.  
332 Based on the glycosylation profile, galectin-3 was found bound only to a select, minor fraction  
333 (~5%) of transferrin, while interestingly none or little was bound to IgG<sup>46</sup>. Overall, variants  
334 from the *MSRI* gene seem to have a pleiotropic effect on transferrin glycosylation, galectin-3  
335 and IGF1. In turn, both galectin-3 and IGF1 are associated with type 2 diabetes. The potential  
336 role of glycosylation of transferrin in these processes still needs to be established.

337



338 In conclusion, we identified rare pLoF and missense variants associated with transferrin and  
339 IgG N-glycome, in both known and not previously reported genes (*TIRAP*, *RFXAP*). By  
340 utilising the power of genetic isolates and aggregated effects of rare variants, we discovered  
341 biologically relevant associations with a 300-fold up-drifted variant in the ORCADES cohort  
342 (in the sialyltransferase gene, *ST6GALI*, affecting levels of sialylation of IgG) and associations  
343 independent of single-point GWAS and ExWAS analyses (in glycosyltransferase genes *FUT8*  
344 and *MGAT3*). Interestingly, many of glycan traits are influenced both by common and rare  
345 variants, revealing a complex genetic architecture of these intermediate phenotypes. While we  
346 did not find any robust links between glycome-associated genes and diseases in studied cohorts,  
347 we discover a potential link between transferrin glycosylation, galectin-3, IGF1 and diabetes.  
348 The exact mechanism behind these connections still needs to be confirmed and further  
349 explored. This study shows that, utilising the power of genetic isolates, gene-based aggregation  
350 tests and intermediate phenotypes such as glycosylation, rare variant associations are detectable  
351 even in relatively small sample sizes (low thousands). However, larger cohorts would be  
352 required to identify the contribution of rare variants to multifactorial, complex diseases.

## 353 **Methods**

354

### 355 **Genotypic data**

#### 356 Exome sequencing

357 The “Goldilocks” exome sequence data for ORCADES, CROATIA-Korcula and VIKING  
358 cohorts was prepared at the Regeneron Genetics Center, following the protocol detailed in Van  
359 Hout *et al.*<sup>2</sup> for the UK Biobank whole-exome sequencing project. In summary, the multiplexed  
360 samples were sequenced on the Illumina NovaSeq 6000 platform using S2 flow cells. The raw  
361 sequencing data was processed by automated analysis using the DNAnexus platform<sup>52</sup>, where  
362 files were converted to FASTQ format, and then aligned to GRCh38 genome reference using  
363 the BWA-mem<sup>53</sup>. Duplicated reads were identified and flagged by the Picard tool<sup>54</sup>. Genotypes  
364 for each individual sample were called using the WeCall variant caller<sup>55</sup>. During quality  
365 control, samples genetically identified as duplicates, showing disagreement between  
366 genetically determined and reported sex, high rates of heterozygosity or contamination, low  
367 sequence coverage (less than 80% of targeted bases achieving 20X coverage) or discordant  
368 with genotyping chip were excluded. The number of samples removed after quality control are  
369 listed in Supplementary Table 13 for each cohort. Finally, the “Goldilocks” dataset was  
370 generated by (i) filtering out genotypes with read depth lower than 7 reads, (ii) keeping variants  
371 having at least one heterozygous variant genotype with allele balance ratio greater than or equal  
372 to 15% ( $AB \geq 0.15$ ) or at least one homozygous variant genotype, and (iii) filtering out variants  
373 with more than 10% of missingness and HWE  $p < 10^{-6}$ . Overall, a total of 2,090 ORCADES  
374 (820 male and 1,270 female), 2,872 CROATIA-Korcula (1,065 male and 1,807 female) and  
375 2,108 VIKING (843 male and 1,265 female) participants passed all exome sequence and  
376 genotype quality control thresholds. A pVCF file containing all samples passing quality control  
377 was then created using the GLnexus joint genotyping tool.<sup>56</sup>

378

#### 379 Variant annotation

380 Exome sequencing variants were annotated as described in Van Hout, *et al.*<sup>2</sup> In brief, each  
381 variant was labelled with the most severe consequence across all protein-coding transcripts,  
382 implemented using SnpEff<sup>57</sup>. Gene regions were defined according to Ensembl release 85.  
383 Variants annotated as stop gained, start lost, splice donor, splice acceptor, stop lost and  
384 frameshift were considered as predicted LOF variants. The deleteriousness of missense variants  
385 was assessed using the following algorithms and classifications (based on dbNSFP 3.2): (1)  
386 SIFT: “D” (Damaging), (2) Polyphen2\_HDIV: “D” (Damaging) or “P” (Possibly damaging),  
387 (3) Polyphen2\_HVAR: “D” (Damaging) or “P” (Possibly damaging), (4) LRT<sup>58</sup>: “D”  
388 (Deleterious) and (5) MutationTaster<sup>59</sup>: “A” (Disease causing automatic) or “D” (Disease  
389 causing). Missense variants were considered “likely deleterious” if predicted as deleterious by

390 all five algorithms, “possibly deleterious” if predicted as deleterious by at least one of the  
391 algorithms and “likely benign” if not predicted as deleterious by any of the algorithms.

392

### 393 Generation of gene burden masks

394 For each gene, we grouped the variants in the gene in four categories (masks), based on severity  
395 of their functional consequence. Mask 1 included only predicted loss-of-function (pLoFs)  
396 variants, mask 2 consisted of pLoF variants and all missense variants, and masks 3 and 4  
397 contained pLoF and predicted deleterious missense variants (“possibly deleterious” and “likely  
398 deleterious” for mask 3 and mask 4, respectively). We considered two separate variations of  
399 each mask based on the frequency of the minor allele of the variants that were screened in that  
400 group:  $MAF \leq 5\%$  and  $MAF \leq 1\%$ . Overall, up to 8 burden tests were performed for each gene  
401 (Supplementary Table 14). Consequently, the masks are not independent - certain masks will  
402 include the variants listed in a different mask and additional, less severe or more frequent  
403 variants.

404

## 405 **Phenotypic data**

### 406 Transferrin and IgG N-glycome quantification

407 Transferrin and total IgG N-glycome quantification for ORCADES, VIKING and CROATIA-  
408 Korcula samples was performed at Genos Glycobiology Laboratory, following the protocol  
409 described in Trbojević-Akmačić *et al.*<sup>60</sup> for transferrin, in Pučić *et al.*<sup>61</sup> for IgG in ORCADES  
410 cohort and batch 1 of CROATIA-Korcula cohort, in Trbojević-Akmačić *et al.*<sup>62</sup> for IgG in  
411 VIKING cohort and batch 2 of CROATIA-Korcula cohort. In summary, proteins of interest  
412 were first isolated from blood plasma (IgG depleted blood plasma, in the case of transferrin)  
413 using affinity chromatography binding to anti-transferrin antibodies plates for transferrin and  
414 protein G plates for IgG. The protein isolation step was followed by release and labelling of N-  
415 glycans and clean-up procedure.. IgG N-glycans have been released from total IgG (all  
416 subclasses). N-glycans were then separated and quantified by hydrophilic interaction ultra-  
417 high-performance liquid chromatography (HILIC-UHPLC). As a result, transferrin and total  
418 IgG samples were separated into 35 (transferrin: TfGP1 – TfGP35) and 24 (IgG: GP1 – GP24)  
419 chromatographic peaks. It is worth noting that there is no correspondence structure-wise  
420 between transferrin TfGP and IgG GP traits labelled with the same number.

421

### 422 Normalisation and batch correction

423 Prior to genetic analysis, raw N-glycan UHPLC data was normalised and batch corrected to  
424 reduce the experimental variation in measurements. Total area normalisation was performed  
425 by dividing the area of each chromatographic peak (35 for transferrin, 24 for IgG) by the total

426 area of the corresponding chromatogram. Due to the multiplicative nature of measurement error  
427 and right-skewness of glycan data, normalised glycan measurements were log10-transformed.  
428 Batch correction was then performed using the empirical Bayes approach implemented in the  
429 “ComBat” function of the “sva” R package<sup>63</sup>, modelling the technical source of variation (96-  
430 well plate number) as batch covariate. Batch corrected measurements were then exponentiated  
431 back to the original scale. Prior to further analysis, each glycan trait was rank transformed to  
432 normal distribution using the “rntransform” function from the “GenABEL” R package<sup>64</sup>.

433

#### 434 Derived glycan traits

435 IgG derived traits analysed included those defined by Huffman *et al.*<sup>65</sup>, and were calculated  
436 using the glycanr R package. In addition, new derived traits were calculated for both transferrin  
437 and IgG, representing the overall presence of a certain sugar structure on the totality of  
438 transferrin/IgG N-glycan traits measured (e.g. percentage of fucosylation). These newly  
439 generated traits are expected to give a direct insight in the biological pathway involved in the  
440 addition of the sugar moiety to glycan structures. Exact formulas used for defining transferrin  
441 and IgG newly derived traits can be found in Supplementary Tables 15 and 16 respectively.

442

#### 443 Health-related quantitative traits

444 To evaluate the potential effect of rare variants affecting glycome on health-related phenotypes,  
445 in the same cohorts we collected 148 health-related, quantitative traits (e.g. anthropological  
446 measurements, blood levels of proteins, metabolites and biomarkers). Excluding traits with  
447 fewer than 800 samples, a total of 116 traits were considered for analysis (75 traits for  
448 ORCADES, 79 for VIKING and 47 for CROATIA-Korcula cohort). Each health-related trait  
449 was rank transformed to normal distribution using the “rntransform” function from the  
450 “GenABEL” R package<sup>64</sup>, followed by applying the rare-variants association pipeline  
451 described below.

452

#### 453 **Gene-based aggregation analysis**

454 We performed variant Set Mixed Model Association Tests (SMMAT)<sup>66</sup> on rank-transformed  
455 glycan traits, fitting a GLMM adjusting for age, sex, sampling batch in the case of CROATIA-  
456 Korcula IgG glycan traits, and familial or cryptic relatedness by kinship matrix. The kinship  
457 matrix was estimated from the genotyped data using the ‘ibs’ function from GenABEL R  
458 package<sup>64</sup>. The SMMAT framework includes 4 variant aggregate tests: burden test, sequence  
459 kernel association test (SKAT), SKAT-O and SMMAT-E, a hybrid test combining the burden  
460 test and SKAT. The 4 variant aggregate tests were performed on 8 different pools of genetic  
461 variants, called “masks”, described above (Supplementary Table 14).

462 Discovery significance threshold was Bonferroni corrected for the approximate number of  
463 genes in the human genome, 20,000, and the number of independent glycan traits, 21 for IgG  
464 and 31 for transferrin ( $0.05/20000/31 = 8.06 \times 10^{-8}$  for transferrin,  $0.05/20000/21 = 1.19 \times 10^{-7}$  for  
465 IgG). The number of independent glycan traits was estimated as the number of principal  
466 components that jointly explained 99% of the total variance of transferrin/IgG glycan traits in  
467 each cohort (Supplementary Tables 17 and 18). PCA was calculated on rank-transformed  
468 glycan traits, separately for each cohort, using the “prcomp” function from “factoextra” R  
469 package<sup>67</sup>. A gene association was considered significant if it passed the above-described  
470 Bonferroni corrected significance threshold in at least one of the 4 performed variant aggregate  
471 tests and if the cumulative allele count of the variants included in the gene was equal or higher  
472 than 10. Replication significance threshold was defined as  $P = 0.05$  divided by the number of  
473 genes and independent glycans to be replicated. For IgG glycans, this threshold was  $P =$   
474  $5.95 \times 10^{-4}$  ( $P = 0.05/4$  genes/21 glycans) and for transferrin glycans, this threshold was  $P =$   
475  $3.23 \times 10^{-4}$  ( $P = 0.05/5$  genes/31 glycans).

476 A similar analysis plan was applied to the health-related phenotypes analysed. Variant Set  
477 Mixed Model Association Tests (SMMAT)<sup>66</sup> was performed on rank-transformed traits, fitting  
478 a GLMM adjusting for age, sex, first 20 ancestral principal components (PCs), batch covariates  
479 when available (e.g. season, time of the day and batch/subcohort) and familial or cryptic  
480 relatedness.

481

## 482 **IgG glycome gene-based aggregation meta-analysis**

483 Gene-based aggregation analysis of IgG glycan traits for ORCADES and VIKING cohorts was  
484 repeated following the same approach as previously described, except for the restriction that  
485 masks included only variants present in both cohorts. Since IgG GP3 was not quantified in  
486 ORCADES cohort, this glycan was excluded from the meta-analysis, bringing the total number  
487 of IgG glycan traits considered to 93. We then used the “SMMAT.meta” function of  
488 “SMMAT” R package<sup>66</sup> to meta-analyse, for each trait, the two studies. To identify significant  
489 results we filter results by the previously described Bonferroni-corrected significance threshold  
490 of  $1.19 \times 10^{-7}$  and by the cumulative allele count of variants included in the gene equal or higher  
491 than 10.

492

## 493 **Genome-wide association analysis**

494 Genome-wide association analyses (GWAS) between HRC-imputed genotypes and 51  
495 transferrin N-glycan traits were performed in 948 samples from CROATIA-Korcula and 959  
496 samples from VIKING. GWAS with 94 IgG N-glycan traits were performed in 1960 samples  
497 from ORCADES, 1866 samples from CROATIA-Korcula and 1086 samples from VIKING.  
498 The sample size of the same cohort differs between transferrin and IgG due to the different  
499 number of samples successfully measured for glycosylation of each protein. Transferrin N-

500 glycan measurements were not available in ORCADES. Rank-transformed glycan traits were  
501 adjusted for age and sex, as fixed effects, and relatedness (estimated as the kinship matrix  
502 calculated from genotyped data) as random effect in a linear mixed model, calculated using the  
503 “polygenic” function from the “GenABEL” R package<sup>64</sup>. Since IgG N-glycan traits for the  
504 CROATIA-Korcula cohort were measured at two separate occasions, the two were considered  
505 as separate cohorts. Therefore, for CROATIA-Korcula, rank transformation was performed  
506 separately in each subcohort. Samples were then merged together for GWAS, but adding batch  
507 (subcohort number - 1 or 2) as fixed effect covariate. Residuals of covariate and relatedness  
508 correction were tested for association with Haplotype Reference Consortium (HRC) r1.1-  
509 imputed SNP dosages using the RegScan v. 0.5 software, applying an additive genetic model  
510 of association.

511 The genomic control inflation factor ( $\lambda_{GC}$ ) was calculated for each glycan and health-related  
512 trait. The mean genomic control inflation factor ( $\lambda_{GC}$ ) for IgG glycan traits was 1.002 (0.982-  
513 1.026) in ORCADES, 1 in CROATIA-Korcula (0.971-1.031) and 0.993 in VIKING cohort  
514 (0.972-1.017) cohort; for transferrin glycan traits  $\lambda_{GC}$  was 1.002 in CROATIA-Korcula (0.982-  
515 1.026) and 0.998 in VIKING (0.974-1.021) cohort. Overall, the confounding effects of the  
516 family structure were correctly accounted for in our analyses.

517

#### 518 **Identification of rare variant associations independent of GWAS and ExWAS signals**

519 To ensure that the rare variant associations identified were independent of associations with  
520 variants discoverable by a GWAS or single-point exome-wide (ExWAS) analysis, we repeated  
521 the aggregate analysis while conditioning on the sentinel SNPs from the single-variant genome-  
522 wide or exome-wide analysis. First, we performed GWAS of glycan traits using the same  
523 individuals as in the analysis of the exome-sequencing data, but using as genotypes SNP  
524 dosages imputed from the HRC imputation panel, as described above. For each glycan trait we  
525 defined the sentinel SNPs as the variants having the lowest significant p-value ( $p < 5 \times 10^{-8}$ ) in  
526 a 1Mb window, and MAF > 1%. Then we also performed the exome-wide association analysis  
527 (ExWAS), following exactly the same protocol, but with exome sequencing data used for  
528 genotypes. We then re-run variant aggregate analysis as previously described, but with  
529 adjusting the glycan traits for the genotype of the sentinel SNPs from the GWAS/ExWAS  
530 significant loci, in addition to the other covariates listed above. The statistical significance level  
531 was determined in the same way as outlined in the main analysis above.

532

#### 533 **Replication of glycome rare associations in different cohorts and associations with health- 534 related traits**

535 To investigate whether glycome rare-variants associations were cohort specific, each  
536 significant gene-glycan trait pair from the cohort-level discovery analysis was tested for  
537 associations in the remaining cohorts. The p-value threshold for replication was set to  $3.23 \times 10^{-}$

538 <sup>4</sup> for transferrin (0.05/31/5) and  $5.95 \times 10^{-4}$  for IgG (0.05/21/4) glycans, correcting for the  
539 number of independent glycan traits (i.e. 31 for transferrin and 21 for IgG) and the number of  
540 discovered glycome-gene pairs (i.e. 5 for transferrin and 4 for IgG in gene-based aggregation  
541 analysis).

542 To investigate whether the glycome associated rare-variants may also affect health-related  
543 phenotypes, we tested for association each glycome-associated gene and 116 health-related  
544 traits. The significance threshold was set to  $5.43 \times 10^{-5}$ , correcting for the number of health-  
545 related traits (116), and the number of discovered glycome-gene pairs and number of glycome-  
546 associated genes (8).

547

#### 548 **Code availability**

549 We used publicly available software tools for all analyses. These software tools are listed in  
550 the main text and in the Methods.

551

#### 552 **Data availability**

553 There is neither Research Ethics Committee approval, nor consent from individual participants,  
554 to permit open release of the individual level research data underlying this study. The datasets  
555 generated and analysed during the current study are therefore not publicly available. Instead,  
556 the research data and/or DNA samples are available from [accessQTL@ed.ac.uk](mailto:accessQTL@ed.ac.uk) on reasonable  
557 request, following approval by the QTL Data Access Committee and in line with the consent  
558 given by participants. Each approved project is subject to a data or materials transfer agreement  
559 (D/MTA) or commercial contract. The UK Biobank genotypic data used in this study were  
560 approved under application 19655, 48511 and 19655 are available to qualified researchers via  
561 the UK Biobank data access process. The expression data used for the analyses described in  
562 this manuscript were obtained from the GTEx Portal on 25/11/2022. Genebass  
563 (<https://app.genebass.org/>) and AstraZeneca PheWAS portal (<https://azphewas.com/>) were  
564 accessed on 06/12/2022.

## 565 References

- 566 1. Maurano, M. T. *et al.* Systematic localization of common disease-associated variation  
567 in regulatory DNA. *Science* (80-. ). **337**, 1190–1195 (2012).
- 568 2. Van Hout, C. V *et al.* Exome sequencing and characterization of 49,960 individuals in  
569 the UK Biobank. *Nature* **586**, 749–756 (2020).
- 570 3. Bomba, L. *et al.* Whole-exome sequencing identifies rare genetic variants associated  
571 with human plasma metabolites. *Am. J. Hum. Genet.* (2022).  
572 doi:10.1016/J.AJHG.2022.04.009
- 573 4. Flannick, J. *et al.* Exome sequencing of 20,791 cases of type 2 diabetes and 24,440  
574 controls. *Nature* **570**, 71–76 (2019).
- 575 5. Jurgens, S. J. *et al.* Analysis of rare genetic variation underlying cardiometabolic  
576 diseases and traits among 200,000 individuals in the UK Biobank. *Nat. Genet.* 2022  
577 **54**, 240–250 (2022).
- 578 6. Bansal, V., Libiger, O., Torkamani, A. & Schork, N. J. Statistical analysis strategies  
579 for association studies involving rare variants. *Nat Rev Genet* **11**, 773–785 (2010).
- 580 7. Zuk, O. *et al.* Searching for missing heritability: Designing rare variant association  
581 studies. doi:10.1073/pnas.1322563111
- 582 8. Vanhooren, V. *et al.* Serum N-glycan profile shift during human ageing. *Exp Gerontol*  
583 **45**, 738–743 (2010).
- 584 9. Vilaj, M., Gudelj, I., Trbojević-Akmačić, I., Lauc, G. & Pezer, M. IgG Glycans as a  
585 Biomarker of Biological Age. in *Biomarkers of Human Aging* 81–99 doi:10.1007/978-  
586 3-030-24970-0\_7
- 587 10. Ząbczyńska, M., Link-Lenczowski, P. & Pocheć, E. Glycosylation in Autoimmune  
588 Diseases. in *The Role of Glycosylation in Health and Disease* (eds. Lauc, G. &  
589 Trbojević-Akmačić, I.) 205–218 (Springer International Publishing, 2021).  
590 doi:10.1007/978-3-030-70115-4\_10
- 591 11. Rudman, N., Gornik, O. & Lauc, G. Altered N-glycosylation profiles as potential  
592 biomarkers and drug targets in diabetes. *FEBS Letters* **593**, 1598–1615 (2019).
- 593 12. Gudelj, I. & Lauc, G. Protein N-Glycosylation in Cardiovascular Diseases and Related  
594 Risk Factors. *Curr. Cardiovasc. Risk Rep.* **12**, (2018).
- 595 13. Rebelo, A. L., Chevalier, M. T., Russo, L. & Pandit, A. Role and therapeutic  
596 implications of protein glycosylation in neuroinflammation. *Trends Mol Med* **28**, 270–  
597 289 (2022).
- 598 14. Costa, A. F., Campos, D., Reis, C. A. & Gomes, C. Targeting Glycosylation: A New  
599 Road for Cancer Drug Discovery. *Trends Cancer* **6**, 757–766 (2020).
- 600 15. Peng, W. *et al.* Clinical application of quantitative glycomics. *Expert Rev. Proteomics*  
601 **15**, 1007–1031 (2018).
- 602 16. Huffman, J. E. *et al.* Polymorphisms in B3GAT1, SLC9A9 and MGAT5 are associated  
603 with variation within the human plasma N-glycome of 3533 European adults. *Hum.*  
604 *Mol. Genet.* **20**, 5000–5011 (2011).
- 605 17. Klarić, L. *et al.* Glycosylation of immunoglobulin G is regulated by a large network of  
606 genes pleiotropic with inflammatory diseases. *Sci. Adv.* **6**, eaax0301 (2020).
- 607 18. Landini, A. *et al.* Genetic regulation of post-translational modification of two distinct  
608 proteins. *Nat. Commun.* 2022 **131** **13**, 1–13 (2022).
- 609 19. Lauc, G. *et al.* Genomics Meets Glycomics—The First GWAS Study of Human N-  
610 Glycome Identifies HNF1 $\alpha$  as a Master Regulator of Plasma Protein Fucosylation.  
611 *PLoS Genet.* **6**, e1001256 (2010).
- 612 20. Lauc, G. *et al.* Loci Associated with N-Glycosylation of Human Immunoglobulin G  
613 Show Pleiotropy with Autoimmune Diseases and Haematological Cancers. *PLoS*



- 614 *Genet.* **9**, (2013).
- 615 21. Sharapov, S. Z. *et al.* Defining the genetic control of human blood plasma N-glycome  
616 using genome-wide association study. *Hum. Mol. Genet.* **28**, 2062–2077 (2019).
- 617 22. Shen, X. *et al.* Multivariate discovery and replication of five novel loci associated with  
618 Immunoglobulin G N-glycosylation. *Nat. Commun.* **8**, 447 (2017).
- 619 23. Wahl, A. *et al.* Genome-wide association study on immunoglobulin G glycosylation  
620 patterns. *Front. Immunol.* **9**, 277 (2018).
- 621 24. Bondt, A. *et al.* Immunoglobulin G (IgG) Fab glycosylation analysis using a new mass  
622 spectrometric high-throughput profiling method reveals pregnancy-associated changes.  
623 *Mol. Cell. proteomics* **13**, 3029–3039 (2014).
- 624 25. Wuhler, M. *et al.* Glycosylation profiling of immunoglobulin G (IgG) subclasses from  
625 human serum. *Proteomics* **7**, 4070–4081 (2007).
- 626 26. Karlsson, I., Ndreu, L., Quaranta, A. & Thorsén, G. Glycosylation patterns of selected  
627 proteins in individual serum and cerebrospinal fluid samples. *J. Pharm. Biomed. Anal.*  
628 **145**, 431–439 (2017).
- 629 27. Spik, G. *et al.* Studies on glycoconjugates. LXIV. Complete structure of two  
630 carbohydrate units of human serotransferrin. *FEBS Lett.* **50**, 296–299 (1975).
- 631 28. Vösa, U. *et al.* Large-scale cis- and trans-eQTL analyses identify thousands of genetic  
632 loci and polygenic scores that regulate blood gene expression. *Nat. Genet.* **2021** 539  
633 **53**, 1300–1310 (2021).
- 634 29. Karczewski, K. J. *et al.* Systematic single-variant and gene-based association testing of  
635 thousands of phenotypes in 394,841 UK Biobank exomes. *Cell Genomics* **2**,
- 636 30. Wang, Q. *et al.* Rare variant contribution to human disease in 281,104 UK Biobank  
637 exomes. *Nature* **597**, 527–532 (2021).
- 638 31. Povysil, G. *et al.* Rare-variant collapsing analyses for complex traits: guidelines and  
639 applications. *Nat. Rev. Genet.* **20**, 747–759 (2019).
- 640 32. Zuk, O. *et al.* Searching for missing heritability : Designing rare variant association  
641 studies. (2014). doi:10.1073/pnas.1322563111
- 642 33. Fitzgerald, K. A. *et al.* Mal (MyD88-adaptor-like) is required for Toll-like receptor-4  
643 signal transduction. *Nature* **413**, 78–83 (2001).
- 644 34. Horng, T., Barton, G. M. & Medzhitov, R. TIRAP: an adapter molecule in the Toll  
645 signaling pathway. *Nat Immunol* **2**, 835–841 (2001).
- 646 35. Aguet, F. *et al.* Genetic effects on gene expression across human tissues. *Nature* **550**,  
647 204–213 (2017).
- 648 36. Jones, E. Y., Fugger, L., Strominger, J. L. & Siebold, C. MHC class II proteins and  
649 disease: a structural perspective. *Nat Rev Immunol* **6**, 271–282 (2006).
- 650 37. Juszcak, A. *et al.* Plasma fucosylated glycans and C-reactive protein as biomarkers of  
651 HNF1A-MODY in young adult-onset nonautoimmune diabetes. *Diabetes Care* **42**,  
652 17–26 (2019).
- 653 38. Pairo-Castineira, E. *et al.* Genetic mechanisms of critical illness in COVID-19. *Nature*  
654 **591**, 92–98 (2021).
- 655 39. Verhelst, X. *et al.* Protein Glycosylation as a Diagnostic and Prognostic Marker of  
656 Chronic Inflammatory Gastrointestinal and Liver Diseases. *Gastroenterology* **158**, 95–  
657 110 (2020).
- 658 40. Wittenbecher, C. *et al.* Plasma N-Glycans as Emerging Biomarkers of  
659 Cardiometabolic Risk: A Prospective Investigation in the EPIC-Potsdam Cohort Study.  
660 *Diabetes Care* **43**, 661–668 (2020).
- 661 41. Meyer, N. M. T. *et al.* Low IGF1 and high IGFBP1 predict diabetes onset in  
662 prediabetic patients. *Eur J Endocrinol* **187**, 555–565 (2022).
- 663 42. Segev, Y. *et al.* Systemic and renal growth hormone-IGF1 axis involvement in a

- 664 mouse model of type 2 diabetes. *Diabetologia* **50**, 1327–1334 (2007).
- 665 43. Gardner, E. J. *et al.* Damaging missense variants in IGF1R implicate a role for IGF-1  
666 resistance in the etiology of type 2 diabetes. *Cell Genomics*  
667 doi:10.1016/j.xgen.2022.100208
- 668 44. Pietzner, M. *et al.* Genetic architecture of host proteins interacting with SARS-CoV-2.  
669 *bioRxiv Prepr. Serv. Biol.* (2020). doi:10.1101/2020.07.01.182709
- 670 45. Carlsson, M. C., Bengtson, P., Cucak, H. & Leffler, H. Galectin-3 guides intracellular  
671 trafficking of some human serotransferrin glycoforms. *J Biol Chem* **288**, 28398–28408  
672 (2013).
- 673 46. Cederfur, C. *et al.* Different affinity of galectins for human serum glycoproteins:  
674 galectin-3 binds many protease inhibitors and acute phase proteins. *Glycobiology* **18**,  
675 384–394 (2008).
- 676 47. Atalar, M. N. *et al.* Assessment of serum galectin-3, methylated arginine and Hs-CRP  
677 levels in type 2 diabetes and prediabetes. *Life Sci* **231**, 116577 (2019).
- 678 48. Lin, D. *et al.* Galectin-3/adiponectin as a new biological indicator for assessing the risk  
679 of type 2 diabetes: a cross-sectional study in a community population. *Aging (Albany*  
680 *NY)* **13**, 15433–15443 (2021).
- 681 49. Ohkura, T. *et al.* Low serum galectin-3 concentrations are associated with insulin  
682 resistance in patients with type 2 diabetes mellitus. *Diabetol Metab Syndr* **6**, 106  
683 (2014).
- 684 50. Vora, A., de Lemos, J. A., Ayers, C., Grodin, J. L. & Lingvay, I. Association of  
685 Galectin-3 With Diabetes Mellitus in the Dallas Heart Study. *J Clin Endocrinol Metab*  
686 **104**, 4449–4458 (2019).
- 687 51. Weigert, J. *et al.* Serum galectin-3 is elevated in obesity and negatively correlates with  
688 glycosylated hemoglobin in type 2 diabetes. *J Clin Endocrinol Metab* **95**, 1404–1411  
689 (2010).
- 690 52. Reid, J. G. *et al.* Launching genomics into the cloud: deployment of Mercury, a next  
691 generation sequence analysis pipeline. *BMC Bioinformatics* **15**, 30 (2014).
- 692 53. Li, H. & Durbin, R. Fast and accurate short read alignment with Burrows-Wheeler  
693 transform. *Bioinformatics* **25**, 1754–1760 (2009).
- 694 54. Institute, B. Picard Tools. (2018).
- 695 55. PLC, G. weCall. (2018).
- 696 56. Lin, M. F. *et al.* GLnexus: joint variant calling for large cohort sequencing. *bioRxiv*  
697 (2018). doi:10.1101/343970
- 698 57. Cingolani, P. *et al.* A program for annotating and predicting the effects of single  
699 nucleotide polymorphisms, SnpEff: SNPs in the genome of *Drosophila melanogaster*  
700 strain w1118; iso-2; iso-3. *Fly* **6**, 80–92 (2012).
- 701 58. Chun, S. & Fay, J. C. Identification of deleterious mutations within three human  
702 genomes. *Genome Res* **19**, 1553–1561 (2009).
- 703 59. Schwarz, J. M., Rodelsperger, C., Schuelke, M. & Seelow, D. MutationTaster  
704 evaluates disease-causing potential of sequence alterations. *Nat Methods* **7**, 575–576  
705 (2010).
- 706 60. Trbojević-Akmačić, I. *et al.* Chromatographic monoliths for high-throughput  
707 immunoaffinity isolation of transferrin from human plasma. *Croat. Chem. Acta* **89**,  
708 203–211 (2016).
- 709 61. Pucić, M. *et al.* High throughput isolation and glycosylation analysis of IgG-variability  
710 and heritability of the IgG glycome in three isolated human populations. *Mol. Cell.*  
711 *Proteomics* **10**, M111.010090-M111.010090 (2011).
- 712 62. Trbojević Akmačić, I., Ugrina, I. & Lauc, G. *Methods in Enzymology, Volume 586:*  
713 *Chapter Three - Comparative Analysis and Validation of Different Steps in Glycomics*

- 714 *Studies*. (2017). doi:<https://doi.org/10.1016/bs.mie.2016.09.027>
- 715 63. Johnson, W. E., Li, C. & Rabinovic, A. Adjusting batch effects in microarray  
716 expression data using empirical Bayes methods. *Biostatistics* **8**, 118–127 (2007).
- 717 64. Karssen, L. C., van Duijn, C. M. & Aulchenko, Y. S. The GenABEL Project for  
718 statistical genomics. *F1000Research* **5**, 914 (2016).
- 719 65. Huffman, J. E. *et al.* Comparative Performance of Four Methods for High-throughput  
720 Glycosylation Analysis of Immunoglobulin G in Genetic and Epidemiological  
721 Research. *Mol. Cell. Proteomics* **13**, 1598–1610 (2014).
- 722 66. Chen, H. *et al.* Efficient Variant Set Mixed Model Association Tests for Continuous  
723 and Binary Traits in Large-Scale Whole-Genome Sequencing Studies. *Am J Hum*  
724 *Genet* **104**, 260–274 (2019).
- 725 67. Kassambara, A. and Mundt, F. Factoextra: Extract and Visualize the Results of  
726 Multivariate Data Analyses. R Package Version 1.0.7. [https://CRAN.R-](https://CRAN.R-project.org/package=factoextra)  
727 [project.org/package=factoextra](https://CRAN.R-project.org/package=factoextra) (2020).
- 728

## 729 **Acknowledgements**

730

731 We thank Dr Nicola Pirastu for his help and advice regarding the statistical methods. The  
732 Orkney Complex Disease Study (ORCADES) was supported by the Chief Scientist Office of  
733 the Scottish Government (CZB/4/276 and CZB/4/710), the Royal Society, the MRC Human  
734 Genetics Unit, Arthritis Research UK and the European Union framework program 6  
735 EUROSPAN project (contract number LSHG-CT-2006-018947). ORCADES DNA  
736 extractions and genotyping were performed at the Genetics Core of the Clinical Research  
737 Facility, University of Edinburgh. We would like to acknowledge the invaluable contributions  
738 of the research nurses in Orkney, the administrative team in Edinburgh, and the people of  
739 Orkney. The CROATIA-Korcula study was funded by grants from the MRC (United  
740 Kingdom), European Commission Framework 6 project EUROSPAN (contract number  
741 LSHG-CT-2006-018947), Croatian Science Foundation (grant 8875) and the Republic of  
742 Croatia Ministry of Science, Education and Sports (216-1080315-0302). Genotyping was  
743 performed in the Genetics Core of the Clinical Research Facility, University of Edinburgh. We  
744 would like to acknowledge all the staff of several institutions in Croatia that supported the  
745 CROATIA-Korcula fieldwork, including, but not limited to, the University of Split and Zagreb  
746 Medical Schools, Institute for Anthropological Research in Zagreb, and the Croatian Institute  
747 for Public Health in Split. The Viking Health Study-Shetland (VIKING) was supported by the  
748 MRC Human Genetics Unit quinquennial programme grant ‘QTL in Health and Disease’. DNA  
749 extractions and genotyping were performed at the Edinburgh Clinical Research Facility,  
750 University of Edinburgh. We would like to acknowledge the invaluable contributions of the  
751 research nurses in Shetland, the administrative team in Edinburgh and the people of Shetland.  
752 We acknowledge support from the European Union’s Horizon 2020 research and innovation  
753 programme IMforFUTURE (A.L. and A.F.-H.: H2020-MSCA-ITN/721815); the RCUK  
754 Innovation Fellowship from the National Productivity Investment Fund (L.K.: MR/R026408/1)  
755 and the MRC Human Genetics Unit programme grant, ‘QTL in Health and Disease’ (J.F.W.  
756 and C.H.: MC\_UU\_00007/10). Finally, this research has been conducted using data from the  
757 UK Biobank Resource (under application 26041, 48511 and 19655). For the purpose of open  
758 access, the author has applied a Creative Commons Attribution (CC BY) licence to any Author  
759 Accepted Manuscript version arising from this submission.

760

## 761 **Ethics**

762 All studies were approved by local research ethics committees and all participants have given  
763 written informed consent. The ORCADES study was approved by the NHS Orkney Research  
764 Ethics Committee and the North of Scotland REC. The CROATIA-Korcula study was  
765 approved by the Ethics Committee of the Medical School, University of Split (approval ID:  
766 2181-198-03-04/10-11-0008). The VIKING study was approved by the South East Scotland  
767 Research Ethics Committee, NHS Lothian (reference: 12/SS/0151).

768

769 **Author contributions**

770 A.L.: Data analysis and interpretation, visualisation, writing—original draft preparation,  
771 writing—review and editing. P.R.H.J.T.: preparation of pipeline for gene-based aggregation  
772 test of rare variants, writing—review and editing. A.F.-H.: computation of new derived IgG  
773 glycan traits, data interpretation. I.T.-A.: Quantification of transferrin and IgG N-glycans,  
774 computation of derived transferrin glycan traits, writing—review and editing. F.V.: Glycan  
775 data quality control. T.P.: Quantification of transferrin and IgG N-glycans. G.T.: preparation,  
776 quality control and annotation of whole-exome sequencing data, writing—review and editing.  
777 A.R.S.: Funding. O.P.: Genomic and demographic data provider for CROATIA-Korcula  
778 cohort. C.H.: Genomic and demographic data provider for CROATIA-Korcula cohort. G.L.:  
779 Conceptualisation, glycan data provider, writing—review and editing. J.F.W.: Funding,  
780 conceptualisation, genomic and demographic data provider for ORCADES and VIKING  
781 cohort, supervision, data interpretation, writing—original draft preparation, writing—review  
782 and editing. L.K.: Conceptualisation, supervision, data interpretation, writing—original draft  
783 preparation, writing—review and editing.  
784

785 **Competing interests**

786 P.R.H.J.T. is an employee of BioAge Labs, Inc. G.T. and A.R.S. are full-time employees of  
787 Regeneron Genetics Center and receive salary, stock and stock options as compensation. G.L.  
788 is the founder and owner of Genos Ltd, a private research organisation that specialises in the  
789 high-throughput glycomic analysis and has several patents in this field. A.F.-H., I.T.-A., F.V.,  
790 and T.P. are employees of Genos Ltd. L.K. is an employee of Humanity Inc., a company  
791 developing direct-to-consumer measures of biological ageing. All other authors declare no  
792 competing interests.
